# Supplementary material for: Slackwater sediments refine the timing of Late Holocene Icelandic canyon-carving floods and confirm they were smaller than reported
Source: Research Square preprint supplement (doi:10.21203/rs.3.rs-83734/v1), 2021-02-15
Supplement: Supplementary file 1 [file 21d97ff2c81234156b98a334.xlsx]

## Sheet: Sample glass geochemistry
					element oxide data - weight percent (%)
	sample	analysis	instrument	date analysed	SiO2	TiO2	Al2O3	FeO	MnO	MgO	CaO	Na2O	K2O	P2O5	Total
	AST 1-1	23 / 1 .	Cameca SX100	2019-10-18	48.6265	1.7604	13.8066	12.3943	0.2066	6.6957	11.8298	2.3541	0.1963	0.1765	98.0468
		2 / 1 .	Cameca SX100	2019-10-18	48.8475	1.809	13.7414	13.0373	0.2276	6.6528	11.4489	2.5667	0.2031	0.1602	98.6945
		6 / 1 .	Cameca SX100	2019-10-18	49.4013	1.8216	14.0522	12.8715	0.2147	6.7373	11.7048	2.5174	0.1921	0.1668	99.6797
		13 / 1 .	Cameca SX100	2019-10-18	49.8014	1.838	13.6063	12.9225	0.2193	6.8847	11.7247	2.4487	0.2237	0.18	99.8493
		4 / 1 .	Cameca SX100	2019-10-18	50.5859	1.8392	14.1807	13.2598	0.2131	6.6333	11.6545	2.1585	0.2636	0.1593	100.948
		17 / 1 .	Cameca SX100	2019-10-18	49.7953	1.8552	13.5847	13.285	0.2232	6.7891	11.5464	2.373	0.2491	0.1702	99.8712
		8 / 1 .	Cameca SX100	2019-10-18	48.7221	1.8585	13.9433	13.2526	0.2065	6.8499	11.5454	2.5598	0.1959	0.1724	99.3064
		18 / 1 .	Cameca SX100	2019-10-18	49.6873	1.8634	13.484	13.0779	0.2182	6.5952	11.4592	2.482	0.1949	0.1769	99.239
		14 / 1 .	Cameca SX100	2019-10-18	50.1588	1.8703	13.6216	13.3223	0.2202	6.7101	11.5355	2.4978	0.2334	0.1638	100.334
		20 / 1 .	Cameca SX100	2019-10-18	50.6315	1.8734	14.0264	13.1654	0.2099	6.8831	11.7528	2.6416	0.2635	0.1711	101.619
		15 / 1 .	Cameca SX100	2019-10-18	50.4478	1.8818	13.3825	12.6816	0.2157	6.7686	11.5605	2.503	0.2729	0.1741	99.8885
		24 / 1 .	Cameca SX100	2019-10-18	50.6112	1.891	13.6622	12.7077	0.217	6.8455	11.4917	2.5365	0.2633	0.1878	100.414
		21 / 1 .	Cameca SX100	2019-10-18	50.5246	1.9191	13.4792	13.1786	0.2351	6.6765	11.2772	2.5205	0.2375	0.1715	100.22
		22 / 1 .	Cameca SX100	2019-10-18	49.7821	1.9356	13.4888	12.8288	0.2212	6.468	11.316	2.6057	0.2596	0.1809	99.0867
		25 / 1 .	Cameca SX100	2019-10-18	50.1988	1.9624	13.6867	13.515	0.2234	6.2096	11.0929	2.5246	0.217	0.191	99.8214
	mean (μ)				49.8548	1.86526	13.7164	13.0334	0.218113	6.69329	11.5294	2.48599	0.23106	0.1735	99.8012
	two standard deviations (2σ)
	AST 1-2	12 / 1 .	Cameca SX100	2019-10-18	54.486	2.2803	13.5383	12.4923	0.2217	3.4139	7.4373	3.6099	0.746	0.452	98.6777
		9 / 1 .	Cameca SX100	2019-10-18	49.6516	2.539	13.4596	14.0792	0.2287	5.9338	10.7298	2.85	0.4365	0.2586	100.167
		10 / 1 .	Cameca SX100	2019-10-18	51.6562	2.643	12.6628	13.8425	0.2246	5.0114	9.4	2.9755	0.5671	0.3432	99.3263
		5 / 1 .	Cameca SX100	2019-10-18	50.1006	2.68	13.2981	13.998	0.2262	5.7757	10.0827	2.8841	0.4706	0.292	99.808
		7 / 1 .	Cameca SX100	2019-10-18	49.0226	2.9154	12.9051	14.5023	0.2389	5.0826	10.0055	2.8188	0.437	0.2967	98.2249
		3 / 1 .	Cameca SX100	2019-10-18	50.1708	2.9518	12.398	14.7427	0.2456	5.2239	9.711	2.8976	0.4617	0.3019	99.105
		16 / 1 .	Cameca SX100	2019-10-18	50.2046	3.0368	12.5144	15.0846	0.2462	4.9756	9.7051	2.898	0.4284	0.3151	99.4088
		11 / 1 .	Cameca SX100	2019-10-18	49.3401	3.0477	12.8286	14.6649	0.2401	5.501	10.287	2.6573	0.3994	0.3143	99.2804
		1 / 1 .	Cameca SX100	2019-10-18	48.9288	3.2477	12.1894	16.0086	0.251	4.8604	9.4017	3.0049	0.3999	0.3343	98.6267
		19 / 1 .	Cameca SX100	2019-10-18	49.4143	3.397	13.021	14.8032	0.2317	4.742	9.236	2.8556	0.5431	0.4072	98.6511
	mean (μ)				50.2976	2.87387	12.8815	14.4218	0.23547	5.05203	9.59961	2.94517	0.48897	0.33153	99.5317
	two standard deviations (2σ)				3.16642	0.642907	0.861934	1.74663	0.0194513	1.32016	1.68027	0.477698	0.201255	0.109402
					element oxide data - weight percent (%)
	sample	analysis	instrument	date analysed	SiO2	TiO2	Al2O3	FeO	MnO	MgO	CaO	Na2O	K2O	P2O5	Total
	AST 2	26 / 1 .	Cameca SX100	2019-10-18	49.356	3.4601	12.6038	15.5916	0.2486	4.6521	8.8379	3.2479	0.535	0.3707	98.9037
		27 / 1 .	Cameca SX100	2019-10-18	49.2213	3.4495	12.2236	15.451	0.2414	4.8063	8.8623	3.0504	0.5507	0.3964	98.2529
		28 / 1 .	Cameca SX100	2019-10-18	49.7799	3.4515	12.5937	16.034	0.2587	4.5237	8.9521	2.9588	0.5571	0.3908	99.5003
		29 / 1 .	Cameca SX100	2019-10-18	52.2914	3.6937	11.7646	15.8214	0.2396	3.5853	7.8444	3.1104	0.9616	0.4379	99.7503
		30 / 1 .	Cameca SX100	2019-10-18	50.325	3.648	12.0257	16.3146	0.2498	4.6823	9.312	3.0696	0.5354	0.404	100.566
		31 / 1 .	Cameca SX100	2019-10-18	50.6203	3.5085	12.3532	16.0907	0.2576	4.4133	8.6007	3.1451	0.6028	0.4054	99.9976
		32 / 1 .	Cameca SX100	2019-10-18	49.6608	3.2401	12.593	14.7768	0.2297	4.9064	9.2453	3.0003	0.5598	0.3612	98.5734
		33 / 1 .	Cameca SX100	2019-10-18	51.3005	3.1963	13.0004	14.8594	0.2369	4.971	9.455	2.9832	0.5357	0.3863	100.925
		34 / 1 .	Cameca SX100	2019-10-18	50.5225	3.4377	12.75	15.4695	0.2594	4.8503	8.9963	3.0381	0.5722	0.3916	100.288
		35 / 1 .	Cameca SX100	2019-10-18	50.3783	3.4376	12.9583	15.6918	0.2376	4.8198	8.9103	3.0726	0.5182	0.3805	100.405
		36 / 1 .	Cameca SX100	2019-10-18	49.9933	3.0478	12.7866	15.2341	0.2544	4.9177	9.1991	2.8584	0.4402	0.3022	99.0338
		37 / 1 .	Cameca SX100	2019-10-18	49.4082	3.4674	12.9017	15.1061	0.2479	4.5663	8.813	3.1014	0.5482	0.3703	98.5305
		38 / 1 .	Cameca SX100	2019-10-18	49.8252	3.1797	12.8011	14.3718	0.2413	4.9137	9.0707	2.7341	0.4835	0.352	97.9731
		39 / 1 .	Cameca SX100	2019-10-18	48.6259	3.4471	12.5966	15.319	0.2488	4.6407	8.9335	3.0102	0.5188	0.3671	97.7077
		40 / 1 .	Cameca SX100	2019-10-18	50.2701	3.3923	12.7971	15.9315	0.2354	4.7733	8.9625	3.059	0.5555	0.3659	100.343
		41 / 1 .	Cameca SX100	2019-10-18	53.0324	3.6466	11.6031	15.4322	0.2346	3.3923	7.6517	3.0717	1.0635	0.4584	99.5865
		42 / 1 .	Cameca SX100	2019-10-18	50.3817	3.43	12.7026	15.7682	0.254	4.7659	9.3085	2.8804	0.5703	0.3865	100.448
		43 / 1 .	Cameca SX100	2019-10-18	51.1431	3.7479	11.9851	15.6657	0.2442	4.0463	8.3727	2.9504	0.6379	0.4512	99.2445
		44 / 1 .	Cameca SX100	2019-10-18	50.192	3.3989	12.8583	15.651	0.2408	4.7558	8.8228	3.2454	0.5815	0.3716	100.118
		45 / 1 .	Cameca SX100	2019-10-18	49.8481	3.454	12.4757	15.3182	0.2455	4.6042	8.738	2.9744	0.5968	0.3815	98.6364
		46 / 1 .	Cameca SX100	2019-10-18	50.9935	3.3182	12.8623	15.1663	0.2454	4.9433	9.3097	3.1617	0.5519	0.387	100.939
		47 / 1 .	Cameca SX100	2019-10-18	50.5961	3.4398	12.713	16.0262	0.2434	4.798	9.1488	3.141	0.5112	0.4013	101.019
		48 / 1 .	Cameca SX100	2019-10-18	49.8562	3.4655	12.7811	15.7439	0.2455	4.7254	8.9719	3.0437	0.5694	0.397	99.7996
		49 / 1 .	Cameca SX100	2019-10-18	50.5281	3.4478	12.7816	15.9925	0.2422	4.8129	9.0096	3.1178	0.4962	0.3732	100.802
		50 / 1 .	Cameca SX100	2019-10-18	50.3709	3.1758	12.5945	14.5845	0.2393	5.085	9.3482	2.9174	0.5484	0.3435	99.2075
		51 / 1 .	Cameca SX100	2019-10-18	49.9591	3.1624	12.7581	14.923	0.2334	4.8464	9.2171	2.9847	0.5224	0.3539	98.9605
		52 / 1 .	Cameca SX100	2019-10-18	53.6583	3.6569	12.3707	15.4985	0.2451	3.611	7.9327	3.0874	0.989	0.4566	101.506
	mean (μ)				50.4496	3.42226	12.5643	15.4753	0.244463	4.60773	8.88247	3.03761	0.596785	0.386815	99.6673
	two standard deviations (2σ)				2.17017	0.339366	0.709914	0.951041	0.0153054	0.861049	0.899429	0.223276	0.299667	0.0684926
					element oxide data - weight percent (%)
	sample	analysis	instrument	date analysed	SiO2	TiO2	Al2O3	FeO	MnO	MgO	CaO	Na2O	K2O	P2O5	Total
	AST 3	1 / 1 .	Cameca SX100	2019-10-19	49.7247	2.2253	14.2899	12.2779	0.2032	6.7384	11.5925	2.5492	0.3161	0.219	100.136
		2 / 1 .	Cameca SX100	2019-10-19	49.9213	2.1998	14.0118	12.5097	0.1998	6.8207	11.7024	2.6896	0.2892	0.2119	100.556
		3 / 1 .	Cameca SX100	2019-10-19	49.8588	2.1757	14.2592	12.4736	0.188	6.6481	11.5776	2.6376	0.3215	0.2005	100.341
		4 / 1 .	Cameca SX100	2019-10-19	50.1811	2.1825	14.3663	12.3553	0.1938	6.611	11.4805	2.5181	0.4123	0.213	100.514
		5 / 1 .	Cameca SX100	2019-10-19	50.3479	2.1971	14.3234	12.2503	0.2054	6.5963	11.6362	2.6289	0.3035	0.2133	100.702
		6 / 1 .	Cameca SX100	2019-10-19	50.8597	2.1857	13.9142	12.0807	0.1917	6.7045	11.667	2.6428	0.3846	0.2298	100.861
		7 / 1 .	Cameca SX100	2019-10-19	51.6459	3.6071	12.2609	15.6356	0.2524	4.3306	8.5317	3.2242	0.7415	0.4419	100.672
		8 / 1 .	Cameca SX100	2019-10-19	49.3306	2.2154	14.254	12.8206	0.1792	6.7337	11.5408	2.6536	0.3724	0.2179	100.318
		9 / 1 .	Cameca SX100	2019-10-19	49.6368	2.2348	13.8629	12.2572	0.2106	6.8197	11.4684	2.7544	0.3865	0.238	99.8693
		10 / 1 .	Cameca SX100	2019-10-19	51.1445	2.2054	14.1433	12.4872	0.1925	6.5586	11.5627	2.6316	0.3719	0.2272	101.525
		11 / 1 .	Cameca SX100	2019-10-19	49.7155	1.1072	14.529	10.0989	0.1768	8.6356	13.9638	2.041	0.1032	0.1028	100.474
		12 / 1 .	Cameca SX100	2019-10-19	50.1922	2.3516	13.6812	12.3846	0.2087	6.2772	11.2193	2.7949	0.3849	0.2552	99.7498
		13 / 1 .	Cameca SX100	2019-10-19	50.6162	2.2015	13.9697	12.4343	0.2029	6.929	11.3736	2.6107	0.2887	0.2168	100.843
		14 / 1 .	Cameca SX100	2019-10-19	50.148	2.1979	14.4196	12.3009	0.1951	6.9077	11.4527	2.6706	0.3326	0.2265	100.852
		15 / 1 .	Cameca SX100	2019-10-19	50.1535	2.2166	14.2043	12.2425	0.2018	6.7247	11.6188	2.6442	0.3561	0.217	100.579
		16 / 1 .	Cameca SX100	2019-10-19	50.6997	2.2128	14.3162	12.3573	0.1999	6.6961	11.5033	2.6556	0.3754	0.2313	101.248
		17 / 1 .	Cameca SX100	2019-10-19	50.0768	2.2621	13.8169	12.1688	0.2126	6.6395	11.512	2.5988	0.2564	0.2352	99.7791
		18 / 1 .	Cameca SX100	2019-10-19	50.6979	2.2671	14.5082	12.5861	0.1998	6.4536	11.6367	2.6304	0.2995	0.2285	101.508
		19 / 1 .	Cameca SX100	2019-10-19	51.1981	2.2023	14.1952	12.2458	0.2166	6.5232	11.4037	2.6718	0.3814	0.2408	101.279
		20 / 1 .	Cameca SX100	2019-10-19	50.7344	2.19	13.9765	12.3227	0.1877	6.634	11.4024	2.7122	0.3126	0.2172	100.69
		21 / 1 .	Cameca SX100	2019-10-19	50.5843	2.0755	14.3036	12.0007	0.1839	7.2323	12.0166	2.5981	0.3451	0.2142	101.554
		22 / 1 .	Cameca SX100	2019-10-19	50.4509	2.2303	14.1268	12.1637	0.1956	6.6724	11.6547	2.654	0.3648	0.2488	100.762
		23 / 1 .	Cameca SX100	2019-10-19	50.2686	2.2087	14.1224	12.0204	0.2103	6.7807	11.4874	2.6625	0.3137	0.228	100.303
		24 / 1 .	Cameca SX100	2019-10-19	49.7723	2.1929	14.4437	12.6855	0.2116	6.6253	11.5872	2.6853	0.3473	0.2172	100.768
		25 / 1 .	Cameca SX100	2019-10-19	48.093	4.5812	13.0008	14.9302	0.2236	5.51	10.6904	3.1545	0.8258	0.4755	101.485
		26 / 1 .	Cameca SX100	2019-10-19	50.6115	2.4014	13.9698	12.504	0.1971	6.1346	10.7328	2.8744	0.4103	0.2468	100.083
		27 / 1 .	Cameca SX100	2019-10-19	50.6871	2.2279	14.073	12.2897	0.2113	6.6697	11.4742	2.6971	0.3749	0.2334	100.938
		28 / 1 .	Cameca SX100	2019-10-19	50.4083	2.2139	13.8625	12.2576	0.1945	6.4546	11.4495	2.6567	0.3422	0.2172	100.057
		29 / 1 .	Cameca SX100	2019-10-19	50.0074	2.198	14.1027	12.2792	0.1864	6.6479	11.3953	2.644	0.3384	0.2321	100.031
		30 / 1 .	Cameca SX100	2019-10-19	50.4328	2.1952	14.1613	12.2484	0.2016	6.6974	11.6882	2.5994	0.3378	0.2286	100.791
		31 / 1 .	Cameca SX100	2019-10-19	49.6324	2.1461	14.0962	12.2378	0.1934	6.6853	11.5229	2.5978	0.2937	0.2115	99.6171
		32 / 1 .	Cameca SX100	2019-10-19	49.6343	2.2052	14.0459	12.2528	0.1952	6.5255	11.455	2.5029	0.3437	0.2309	99.3914
		33 / 1 .	Cameca SX100	2019-10-19	49.7694	2.2422	13.9163	12.7669	0.1898	6.7638	11.6173	2.6007	0.2958	0.2122	100.374
		34 / 1 .	Cameca SX100	2019-10-19	50.2651	2.1896	14.1795	12.2385	0.2084	6.7846	11.8599	2.6153	0.3349	0.2324	100.908
		35 / 1 .	Cameca SX100	2019-10-19	50.0917	2.2971	13.8127	12.391	0.1898	6.4731	11.2745	2.7203	0.3524	0.2351	99.8377
		36 / 1 .	Cameca SX100	2019-10-19	50.1812	2.1797	14.0918	12.0843	0.1942	6.7909	11.6326	2.5918	0.3054	0.2038	100.256
		37 / 1 .	Cameca SX100	2019-10-19	50.3876	2.1838	14.1658	11.951	0.202	6.6556	11.5984	2.7636	0.3047	0.2294	100.442
		38 / 1 .	Cameca SX100	2019-10-19	50.5319	2.2034	13.8937	11.9244	0.2068	6.776	11.6342	2.7281	0.3932	0.2345	100.526
		39 / 1 .	Cameca SX100	2019-10-19	50.5503	2.1635	14.3993	12.4673	0.1848	6.935	11.7082	2.6836	0.2785	0.2133	101.584
		40 / 1 .	Cameca SX100	2019-10-19	50.6091	2.346	13.877	13.1851	0.1966	6.1964	11.1619	2.8895	0.3959	0.2384	101.096
		41 / 1 .	Cameca SX100	2019-10-19	50.4159	2.3458	14.0767	13.201	0.2041	6.358	11.0113	2.7355	0.4199	0.2454	101.014
		42 / 1 .	Cameca SX100	2019-10-19	50.6783	2.2732	13.7301	13.0338	0.1902	6.5392	11.4977	2.8188	0.3437	0.2169	101.322
	mean (μ)				50.2606	2.28425	14.0418	12.462	0.199755	6.61644	11.4761	2.677	0.35839	0.234033	100.61
	two standard deviations (2σ)				1.15139	0.910445	0.771489	1.55674	0.0259764	1.07668	1.28528	0.338743	0.218889	0.110181
					element oxide data - weight percent (%)
	sample	analysis	instrument	date analysed	SiO2	TiO2	Al2O3	FeO	MnO	MgO	CaO	Na2O	K2O	P2O5	Total
	AST 4-2	66 / 1 .	Cameca SX100	2019-10-19	50.8137	1.3403	14.7348	11.1219	0.1897	8.0751	13.002	2.2293	0.1682	0.1137	101.789
		67 / 1 .	Cameca SX100	2019-10-19	50.4451	1.3787	14.3107	11.1501	0.1895	8.0386	13.1165	2.0904	0.1433	0.1113	100.974
		59 / 1 .	Cameca SX100	2019-10-19	50.0981	1.3788	14.5125	11.2819	0.1921	7.9213	13.0835	2.1638	0.1299	0.1275	100.889
		48 / 1 .	Cameca SX100	2019-10-19	50.2016	1.3732	14.4519	11.4271	0.1912	7.8801	12.9961	2.1049	0.1591	0.1068	100.892
		47 / 1 .	Cameca SX100	2019-10-19	50.2288	1.3798	14.2542	11.4977	0.1792	7.8516	13.2271	2.1982	0.1245	0.1176	101.059
		64 / 1 .	Cameca SX100	2019-10-19	50.6871	1.3896	14.4554	11.1622	0.1937	7.8382	13.1127	2.0853	0.1621	0.1198	101.206
		44 / 1 .	Cameca SX100	2019-10-19	50.4482	1.4809	14.5254	11.7628	0.1967	7.7497	12.9871	2.1202	0.1794	0.1305	101.581
		80 / 1 .	Cameca SX100	2019-10-19	50.4088	1.3861	14.6977	11.1529	0.1929	7.6953	13.2098	2.0966	0.1376	0.1229	101.101
		51 / 1 .	Cameca SX100	2019-10-19	50.622	1.4391	14.7423	11.4452	0.2005	7.6937	13.1869	2.1883	0.1607	0.1226	101.801
		46 / 1 .	Cameca SX100	2019-10-19	49.3878	1.4049	14.0241	11.5841	0.1927	7.5357	13.035	2.112	0.1256	0.1197	99.5216
		50 / 1 .	Cameca SX100	2019-10-19	49.8363	1.7084	13.6283	12.1849	0.1992	7.3105	12.4527	2.3718	0.2028	0.1607	100.056
		77 / 1 .	Cameca SX100	2019-10-19	51.2035	1.6936	14.2346	12.4704	0.1931	7.1342	12.3763	2.342	0.1907	0.1705	102.009
	mean (μ)				50.3651	1.44612	14.381	11.5201	0.192542	7.727	12.9821	2.17523	0.156992	0.126967	101.073
	two standard deviations (2σ)				0.901923	0.237896	0.61674	0.824201	0.0103937	0.538968	0.532256	0.18587	0.0491437	0.0369752
	AST 4-1	75 / 1 .	Cameca SX100	2019-10-19	50.8031	1.951	14.4495	11.9254	0.2031	7.0252	12.4712	2.5058	0.2856	0.1744	101.794
		58 / 1 .	Cameca SX100	2019-10-19	51.3989	1.8316	13.9765	13.5715	0.2266	6.5767	11.8934	2.4652	0.2198	0.1722	102.332
		68 / 1 .	Cameca SX100	2019-10-19	51.6205	1.9396	14.1	12.3351	0.1972	6.2114	11.1379	2.7129	0.3187	0.231	100.804
		55 / 1 .	Cameca SX100	2019-10-19	51.7039	1.9553	13.913	12.859	0.2111	5.9417	10.7026	2.9321	0.3342	0.2243	100.777
		65 / 1 .	Cameca SX100	2019-10-19	51.5182	1.9549	14.4447	12.4075	0.1977	5.7554	10.7616	2.7222	0.3792	0.2296	100.371
		43 / 1 .	Cameca SX100	2019-10-19	52.227	2.0529	14.1437	12.5422	0.2081	5.6999	10.3449	3.0036	0.4799	0.2689	100.971
		45 / 1 .	Cameca SX100	2019-10-19	51.9275	2.0455	14.3357	12.4162	0.2064	5.6135	10.2755	3.1041	0.3806	0.2563	100.561
		52 / 1 .	Cameca SX100	2019-10-19	52.2767	2.0431	14.5269	12.4193	0.2009	5.512	10.3008	2.8591	0.4134	0.2665	100.819
		49 / 1 .	Cameca SX100	2019-10-19	52.1317	2.1173	13.9638	12.4799	0.1905	5.4082	9.8812	2.9904	0.3963	0.2816	99.8409
		60 / 1 .	Cameca SX100	2019-10-19	51.59	2.0802	14.4737	12.4077	0.2082	5.3899	9.9318	3.1412	0.4044	0.2713	99.8984
		72 / 1 .	Cameca SX100	2019-10-19	51.8053	2.0809	14.4087	12.5517	0.2091	5.3678	9.7716	3.3136	0.474	0.2722	100.255
		76 / 1 .	Cameca SX100	2019-10-19	52.8178	2.0979	14.3837	12.2898	0.2118	5.2014	9.9047	3.1001	0.4699	0.2796	100.757
		69 / 1 .	Cameca SX100	2019-10-19	53.2036	2.1732	14.2163	12.2243	0.1964	5.1022	9.3724	3.0582	0.4535	0.3095	100.31
		53 / 1 .	Cameca SX100	2019-10-19	52.2881	2.1478	14.4504	12.4491	0.2149	5.1008	9.6354	3.1835	0.4263	0.2869	100.183
		78 / 1 .	Cameca SX100	2019-10-19	52.0181	2.0962	14.4715	12.2446	0.2	5.099	9.8412	3.087	0.4317	0.2695	99.7588
		63 / 1 .	Cameca SX100	2019-10-19	52.1607	2.145	14.6037	12.6248	0.2136	4.9173	9.3914	3.2246	0.4697	0.2748	100.026
		54 / 1 .	Cameca SX100	2019-10-19	52.7918	2.2426	14.3466	12.7716	0.206	4.7576	8.9235	3.2952	0.5531	0.3178	100.206
	mean (μ)				52.0107	2.04438	14.2954	12.5727	0.206978	5.62233	10.3418	2.95088	0.398561	0.254306	100.698
	two standard deviations (2σ)				1.10294	0.21675	0.412705	0.883683	0.0182328	1.20889	1.82575	0.544083	0.163699	0.0820918
	AST 4-3	62 / 1 .	Cameca SX100	2019-10-19	48.6149	4.3853	13.1335	14.9052	0.2269	4.9704	9.7809	3.0532	0.7999	0.5422	100.412
		61 / 1 .	Cameca SX100	2019-10-19	48.4241	4.3812	13.3694	15.1117	0.2277	4.878	9.7453	3.2232	0.8131	0.5285	100.702
		79 / 1 .	Cameca SX100	2019-10-19	47.8332	4.3874	13.2019	15.2374	0.2116	5.1247	9.7116	3.2443	0.8182	0.5213	100.292
		74 / 1 .	Cameca SX100	2019-10-19	48.106	4.3853	13.3532	14.7877	0.215	4.8079	9.5043	3.2333	0.8301	0.5564	99.7792
		70 / 1 .	Cameca SX100	2019-10-19	47.2729	4.3726	13	14.7154	0.1949	4.8266	9.603	3.2856	0.7925	0.5374	98.6009
		73 / 1 .	Cameca SX100	2019-10-19	47.884	4.4114	13.1959	14.9938	0.2084	4.837	9.7651	3.2533	0.8285	0.5423	99.9197
		71 / 1 .	Cameca SX100	2019-10-19	48.6421	4.3761	13.0927	15.1531	0.2233	4.9296	9.6246	3.2597	0.8526	0.5469	100.701
	mean (μ)				48.111	4.38561	13.1924	14.9863	0.2154	4.9106	9.6764	3.2218	0.819271	0.539286	100.058
	two standard deviations (2σ)				0.915003	0.0232707	0.248096	0.359413	0.0217755	0.205439	0.188927	0.142559	0.0373739	0.0215384	1.3582

## Sheet: Standard glass geochemistry
					element oxide data - weight percent (%)
	standard	analysis	instrument	date analysed	SiO2	TiO2	Al2O3	FeO	MnO	MgO	CaO	Na2O	K2O	P2O5	Total
	BCR2g	1 / 1 .	Cameca SX100	2019-10-19	55.0849	2.2376	13.6694	12.7192	0.1967	3.638	7.1395	3.1205	1.801	0.3758	99.9825
		2 / 1 .	Cameca SX100	2019-10-19	54.7784	2.2365	13.995	12.8684	0.1903	3.611	7.3121	3.3342	1.9235	0.3712	100.621
		3 / 1 .	Cameca SX100	2019-10-19	55.9849	2.2422	13.5086	12.445	0.2027	3.7688	7.1267	3.2164	1.8645	0.3582	100.718
		4 / 1 .	Cameca SX100	2019-10-19	54.4103	2.2446	13.2476	12.7715	0.1951	3.7368	7.337	3.1418	1.7734	0.3734	99.2316
		5 / 1 .	Cameca SX100	2019-10-19	55.3177	2.2473	13.7033	12.7452	0.1822	3.6823	7.0772	3.4048	1.7268	0.3647	100.451
		6 / 1 .	Cameca SX100	2019-10-19	55.2669	2.2443	13.6693	12.5998	0.1906	3.723	7.0396	3.2994	1.8339	0.3833	100.25
		7 / 1 .	Cameca SX100	2019-10-19	55.051	2.2529	14.0126	12.728	0.2045	3.6798	7.2973	3.3015	1.7813	0.3561	100.665
		8 / 1 .	Cameca SX100	2019-10-19	54.4294	2.2275	13.521	12.736	0.1978	3.5804	6.9369	3.2575	1.8537	0.371	99.1111
	mean (μ)				55.0404	2.24161	13.6659	12.7016	0.194987	3.67751	7.15829	3.25951	1.81976	0.369212	100.129
	two standard deviations (2σ)				0.964718	0.0144508	0.474681	0.237704	0.0135198	0.121164	0.270135	0.180394	0.115623	0.017031	1.1953

## Sheet: Similarity Coefficients (SCs)
			Similarity Coefficents (SCs) based on major oxides >1 %wt from ref. X
	sample	analysis	Kári1-113 1	Kári1-113 2	Kári1-113 3	Kári1-113 4	Kári1-113 5	Kári1-113 6
	AST 2	26 / 1 .	0.935786	0.947653	0.926346	0.931117	0.929939	0.913396
		27 / 1 .	0.951516	0.950683	0.933838	0.961193	0.95764	0.926983
		28 / 1 .	0.958235	0.955147	0.938219	0.97278	0.966173	0.923711
		30 / 1 .	0.962417	0.956346	0.939467	0.979581	0.971083	0.923927
		31 / 1 .	0.962918	0.956309	0.939946	0.985901	0.971754	0.926278
		32 / 1 .	0.962046	0.95471	0.939035	0.991796	0.973794	0.927056
		33 / 1 .	0.958541	0.950948	0.935543	0.988871	0.975705	0.929563
		34 / 1 .	0.956456	0.948744	0.933429	0.986929	0.974031	0.930611
		35 / 1 .	0.956793	0.949379	0.93405	0.986473	0.972005	0.928733
		36 / 1 .	0.954671	0.946939	0.933733	0.983685	0.969179	0.929832
		37 / 1 .	0.953861	0.945893	0.933534	0.985051	0.968071	0.930242
		38 / 1 .	0.952856	0.943933	0.932791	0.983422	0.966123	0.930715
		39 / 1 .	0.951339	0.94242	0.932742	0.984116	0.964572	0.929236
		40 / 1 .	0.95018	0.941269	0.93209	0.984006	0.963372	0.928856
		42 / 1 .	0.950517	0.941608	0.93282	0.984618	0.963723	0.9282
		43 / 1 .	0.950751	0.941864	0.933479	0.985334	0.962135	0.927203
		44 / 1 .	0.950168	0.940705	0.934444	0.96467	0.959993	0.925634
		45 / 1 .	0.948508	0.938483	0.933066	0.962426	0.957767	0.926199
		46 / 1 .	0.945142	0.934271	0.932974	0.958133	0.953489	0.924105
		47 / 1 .	0.944686	0.931852	0.932968	0.955695	0.951054	0.924255
		48 / 1 .	0.944063	0.931196	0.932587	0.955019	0.950378	0.924117
		49 / 1 .	0.940594	0.927633	0.93057	0.951353	0.946681	0.925034
		50 / 1 .	0.931472	0.918003	0.923825	0.941322	0.936517	0.954719
		51 / 1 .	0.920995	0.908479	0.91522	0.931492	0.926607	0.955723
	mean (μ)		0.95
