# Supplementary material for: Slackwater sediments refine the timing of Late Holocene Icelandic canyon-carving floods and confirm they were smaller than reported
Source: Research Square preprint supplement (doi:10.21203/rs.3.rs-83734/v1), 2021-02-15
Supplement: Supplementary file 2 [file 517975ae948e810bbec547a1.docx]

**Supplementary Information**

| **Sample name** | **Core depth (cm)** | **Material** | **mg C** | **14C age (yr BP)** | **Error (yr BP)** | **Cal. yr BP (2σ)** |
| --- | --- | --- | --- | --- | --- | --- |
| LuS 15020 | 84.5 | *bulk organic* | 1.2 | 1835* | 40 | 1694-1873 |
| LuS 14877 | 86.5 | *bulk organic* | 0.6 | 2135* | 40 | 1998-2183 |
| LuS 14880 | 174.7 | *bulk organic* | 0.7 | 2015* | 40 | 1879-2064 |
| LuS 15021 | 178.2 | *peat* | 1.7 | 1465 | 35 | 1301-1407 |
| LuS 14879 | 245.7 | *peat* | 1.3 | 1540 | 35 | 1356-1525 |
| LuS 14878 | 260.7 | *bulk organic* | 1.3 | 1850* | 35 | 1710-1872 |
| LuS 15022 | 299.2 | *aquatic plants* | 1.1 | 3090 | 40 | 3208-3386 |
| LuS 14881 | 302.7 | *bulk organic* | 1.3 | 7830* | 40 | 8539-8730 |
| LuS 15023 | 349.2 | *bulk organic* | 1.4 | 4260* | 40 | 4804-4887 |
| LuS 14882 | 448.5 | *peat* | 1.4 | 4030 | 40 | 4418-4589 |

**Supplementary Table 1.** Overview of all radiocarbon ages that have been extracted and dated from master core AST-P2-18. Calibrated ages and errors are based on the Intcal14 curve as discussed under “Chronology” in the main text. Outliers are highlighted with an asterisk (*).

| **Deposit** | **Core depth (cm)** | **Correlation** | **Volcanic source** | **Age (cal. yr BP)** | **Reference(s)** |
| --- | --- | --- | --- | --- | --- |
| AST1 | 9.5 | V-1717 | *Bárðarbunga* | 233 ± 10 | 50 |
| AST2 | 69 | 1-113 | *Kverkfjöll* | 1325 ± 100 | 52 |
| AST3 | 264 | G-Svart | *Grímsvötn* | 1698 ± 10 | 57 |
| AST4 | 292 | Tentative | *Askja/Krafla?* | 2900-3500/2850±250 | 61 62 |

**Supplementary Table 2.** Summary of tephra deposits investigated in this study with respect to their name, core depth, volcanic source and the reported ages of correlative isochrons.


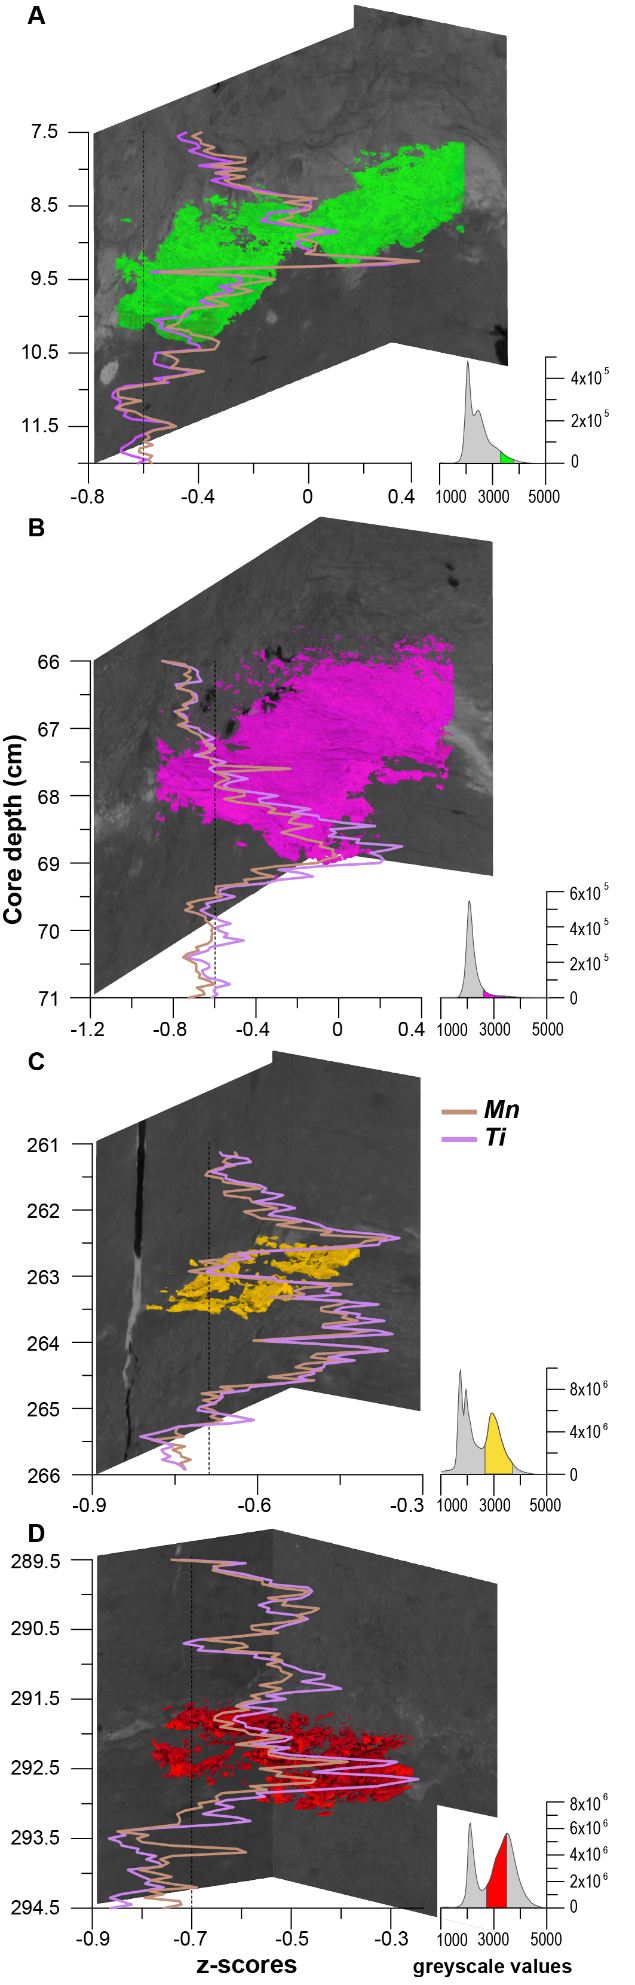


**Supplementary Figure 1**. CT ortho slices (2-D) and volume renderings (3-D) of analyzed visible tephra horizons (see Fig. 4) in colors that match Figs. 1, 6 and 7. Histograms show the greyscale distributions for each displayed core section in grey, while the range of volcanic ash is highlighted in color. On top of the CT imagery, we plot profiles of standardized XRF Titanium (Ti) and Manganese (Mn) counts; diagnostic elements for basaltic ash ( “methods”).


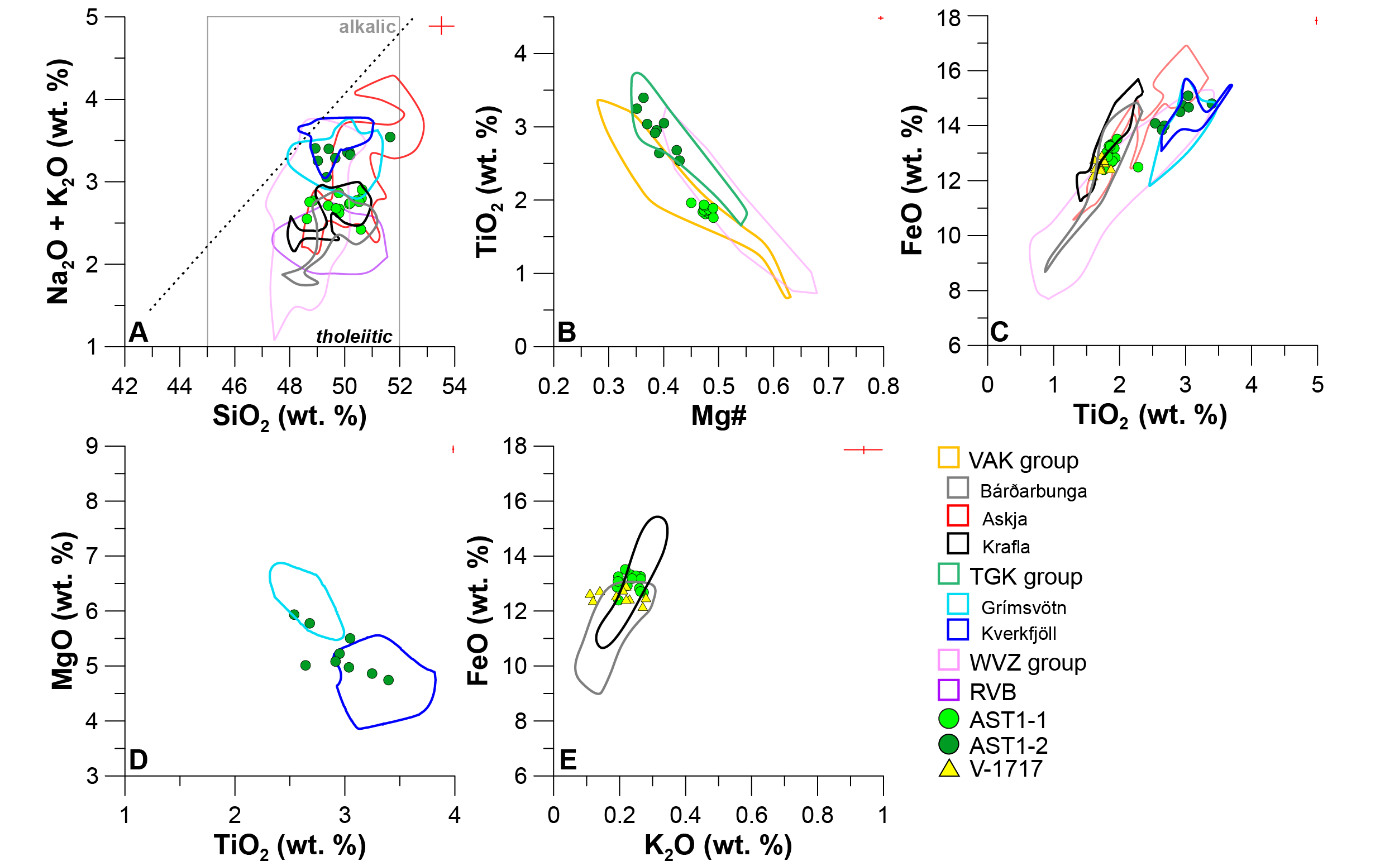


**Supplementary Figure 2.** Key discriminatory element oxide bi-plots for the shard populations of horizon AST1 (see Fig. 4 and “chronology” in the main text for additional details). Reference Compositional Fields (RCFs) of active Icelandic volcanoes are delineated after82 and 36 in colors matching those of Fig. 1. In-set red crosses mark the analytical uncertainty of measurements, based on the pooled and weighted 2σ of secondary standard analyses (Supplementary data).

**
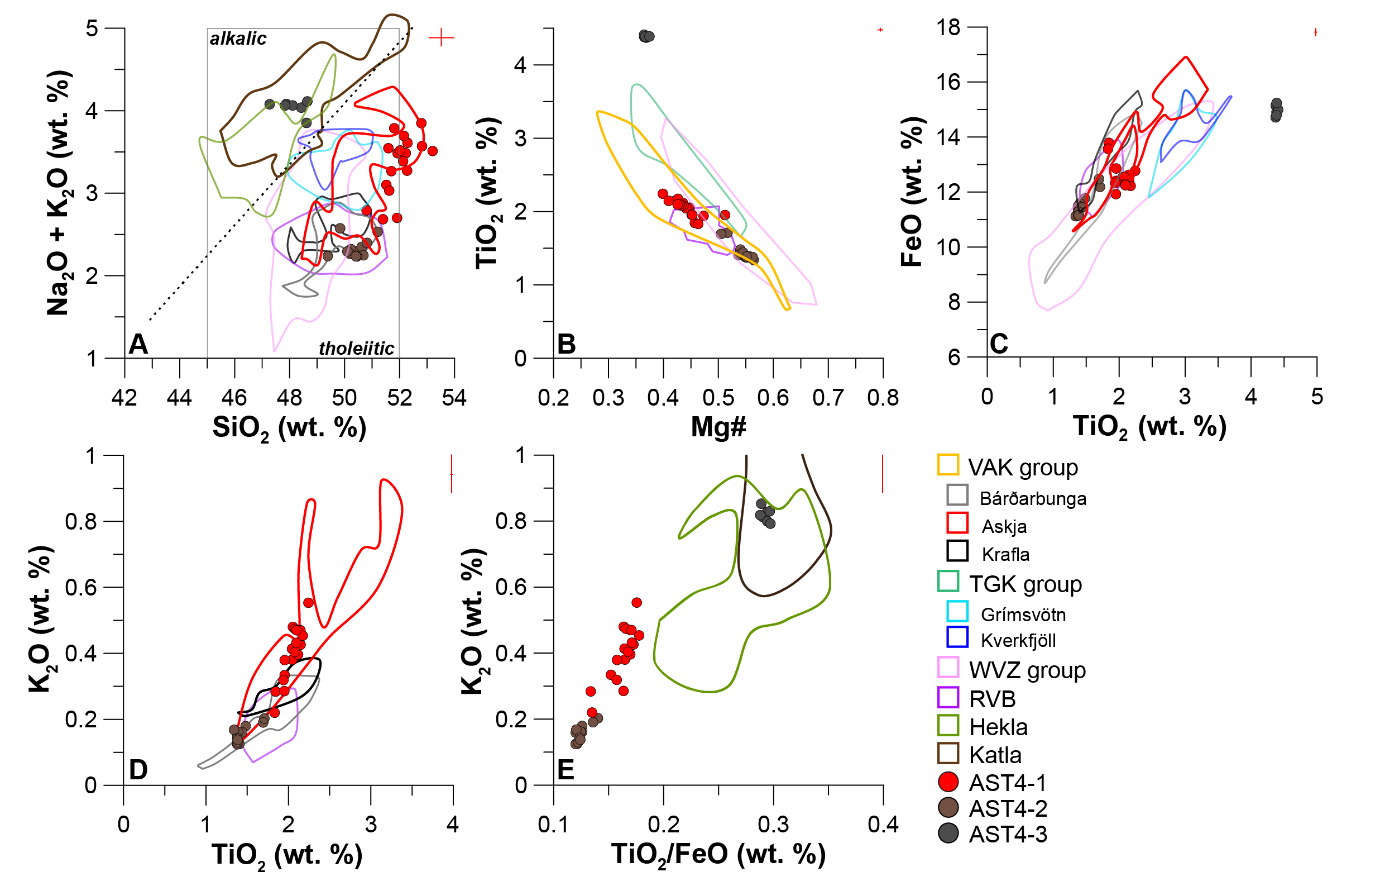
**

**Supplementary Figure 3.** Key discriminatory element oxide bi-plots for the shard populations of horizon AST4 (see Fig. 4 and “chronology” in the main text for additional details). Reference Compositional Fields (RCFs) of active Icelandic volcanoes are delineated after82 and36 in colors matching those of Fig. 1. In-set red crosses mark the analytical uncertainty of measurements, based on the pooled and weighted 2σ of secondary standard analyses (Supplementary data).
